# Supplementary material
Source: PubMed Central journal article supplement (PMC11029677)
Supplement: 262_2015_1766_MOESM1_ESM.pdf [file 262_2015_1766_MOESM1_ESM.pdf]

**Supplementary Table 1****Cytokine concentrations (pg/ml)**

| <b>Patient no</b> | <b>IFN-<math>\gamma</math></b> | <b>TNF-<math>\alpha</math></b> | <b>IL-1<math>\beta</math></b> | <b>IL-2</b>                    | <b>IL-4</b>   |
|-------------------|--------------------------------|--------------------------------|-------------------------------|--------------------------------|---------------|
| 710               | 413                            | 151                            | 5                             | <1                             | 1             |
| 712               | 1367                           | 470                            | <1                            | 64                             | 1             |
| 725               | 122                            | 61                             | 5                             | <1                             | 1             |
| 704               | 4838                           | 246                            | 37                            | <1                             | 3             |
| 708               | 1163                           | 1364                           | 12                            | <1                             | 55            |
| 711               | 2539                           | 298                            | 3                             | <1                             | <1            |
| 721               | 27                             | 52                             | <1                            | 6                              | <1            |
| 307               | 159                            | 294                            | 8                             | 4                              | <1            |
| 302               | 32                             | 162                            | 22                            | 29                             | 9             |
| 303               | 12                             | 16                             | 2                             | 13                             | <1            |
| 107               | 42                             | 225                            | <1                            | 35                             | 1             |
| 108               | 313                            | 428                            | 19                            | 23                             | 1             |
| 305               | 400                            | 524                            | 129                           | 117                            | 5             |
| 113               | 146                            | 689                            | 2                             | 8                              | 1             |
| 205               | <1                             | 137                            | 2                             | 16                             | <1            |
|                   | <b>IL-5</b>                    | <b>IL-6</b>                    | <b>IL-8</b>                   | <b>IL-10</b>                   | <b>IL-13</b>  |
| 710               | 3                              | 467                            | 3542                          | 12                             | 127           |
| 712               | 84                             | 9                              | 303                           | 1                              | 6337          |
| 725               | 16                             | 49                             | 298                           | <1                             | 309           |
| 704               | 42                             | 1118                           | 1865                          | 41                             | 274           |
| 708               | 10595                          | 2218                           | 14785                         | 586                            | 40347         |
| 711               | 75                             | 36                             | 664                           | 19                             | 621           |
| 721               | 52                             | 10                             | 72                            | <1                             | 264           |
| 307               | 65                             | 121                            | 3873                          | <1                             | 440           |
| 302               | 2412                           | 409                            | 694                           | 168                            | 2329          |
| 303               | 12                             | 45                             | 1058                          | <1                             | 71            |
| 107               | 716                            | 48                             | 318                           | 7                              | 1245          |
| 108               | 225                            | 319                            | 2569                          | 45                             | 1797          |
| 305               | 96                             | 3107                           | 25624                         | 53                             | 637           |
| 113               | 219                            | <1                             | 8331                          | 20                             | 569           |
| 205               | 7                              | 64                             | 895                           | <1                             | 156           |
|                   | <b>IL-17</b>                   | <b>G-CSF</b>                   | <b>MCAF</b>                   | <b>MIP-1<math>\beta</math></b> | <b>GM-CSF</b> |
| 710               | 75                             | 18                             | 449                           | 2872                           | 49            |
| 712               | 49                             | <1                             | 1                             | <1                             | 651           |
| 725               | <1                             | 1                              | 26                            | 2698                           | 13            |
| 704               | 276                            | 16                             | 207                           | 7539                           | 75            |
| 708               | 263                            | 118                            | 120                           | <1                             | 1140          |
| 711               | 134                            | 1                              | 103                           | <1                             | 54            |
| 721               | <1                             | <1                             | 2                             | 954                            | <1            |
| 307               | <1                             | 1                              | 1442                          | 436                            | <1            |
| 302               | 71                             | 3                              | <1                            | 666                            | 34            |
| 303               | 7                              | 1                              | 44                            | 47                             | <1            |
| 107               | 124                            | 2                              | <1                            | 3172                           | 73            |
| 108               | 7                              | 3                              | 318                           | 1613                           | 25            |
| 305               | 223                            | 68                             | 5095                          | 1455                           | 4             |
| 113               | 61                             | 10                             | <1                            | 6203                           | <1            |
| 205               | <1                             | 2                              | <1                            | 400                            | <1            |

The cytokine profile of samples from 15 NSCLC patients was determined in Bioplex assays. T cells were stimulated with irradiated PBMCs +/- peptide GV1001. Supernatants from duplicate cultures were harvested after 48h and analyzed. The table gives mean concentrations (pg/ml) from duplicates.

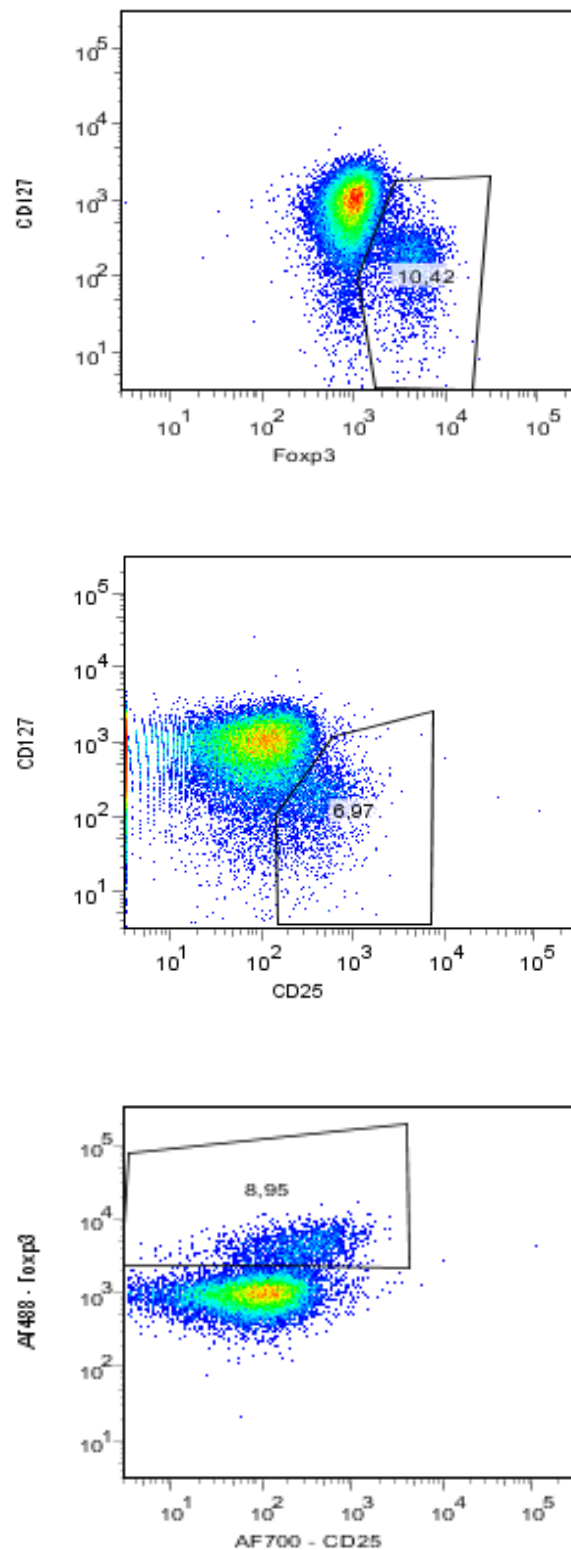

### Supplementary Figure 1

Treg frequency calculation. PBMCs were stained for flow cytometry with mAbs against CD4, CD25, CD127, Foxp3. The CD4<sup>+</sup> subpopulation was determined. Three gates were set, identifying CD127<sup>+</sup>/Foxp3<sup>+</sup> (top plot), CD127<sup>+</sup>/CD25<sup>+</sup> (middle plot) and Foxp3<sup>+</sup> (bottom plot) cells. Tregs were defined as the intersection of these three subpopulations. The Treg percentage was calculated as frequency of CD4<sup>+</sup> cells.

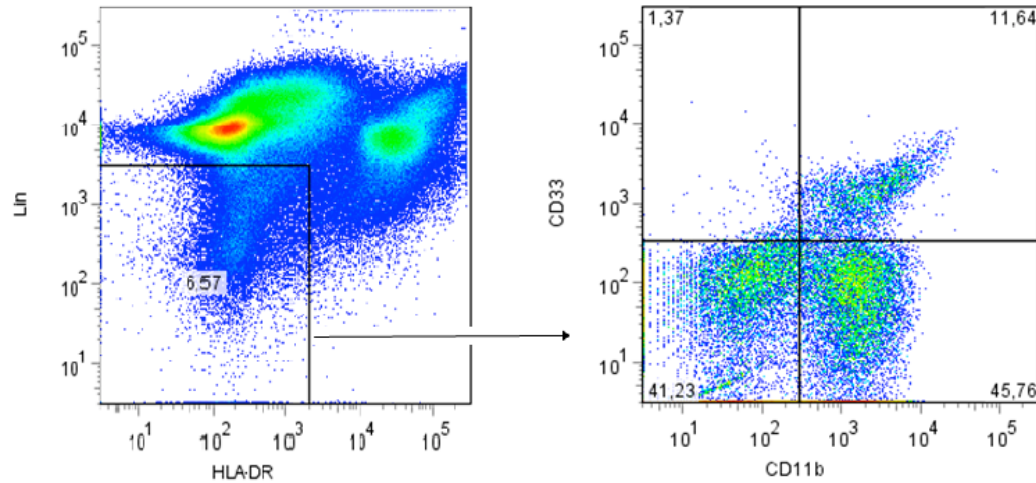

### Supplementary Figure 2

Flow cytometry analysis of Lin<sup>-/lo</sup>HLA-DR<sup>-</sup>CD33<sup>+</sup>CD11b<sup>+</sup> MDSCs (patient 712). Left: PBMCs were stained for HLA-DR and lineage (Lin: CD 4/CD8/CD19/CD57) after CD14 exclusion. Lin<sup>-/lo</sup>HLA-DR<sup>-</sup> cells were gated. Right: CD33<sup>+</sup>/CD11<sup>+</sup> subpopulation of the Lin<sup>-/lo</sup>HLA-DR<sup>-</sup> cells was determined. MDSC frequency was calculated as percentage of mononuclear cells.

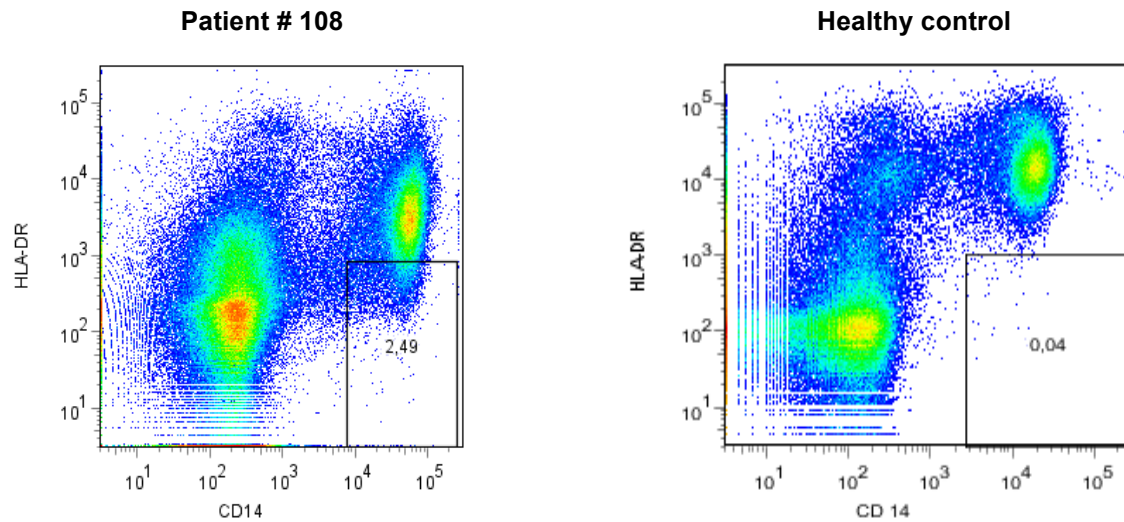

### Supplementary Figure 3

Frequency of HLA-DR<sup>low</sup>CD14<sup>+</sup> MDSC. PBMCs were stained for CD14 and HLA-DR after CD19 exclusion. Frequency was calculated as percentage of mononucleated cells. Left: NSCLC patient with an increased number of HLA-DR<sup>low</sup>CD14<sup>+</sup> cells. Right: healthy control

**a**

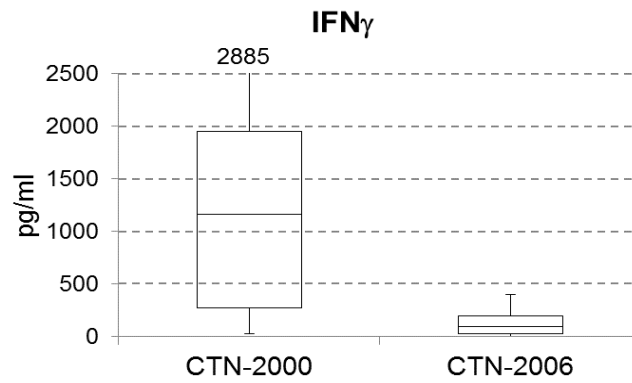

**b**

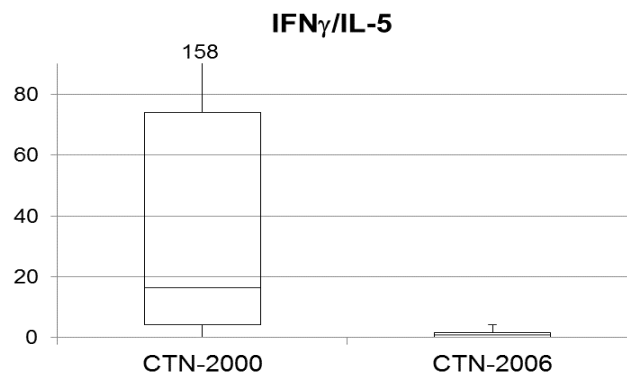

**c**

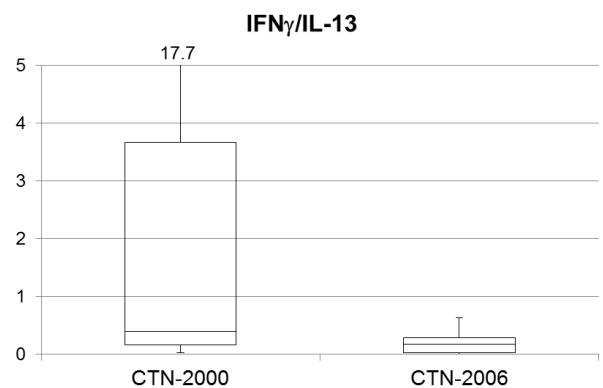

#### **Supplementary Figure 4**

Comparison of cytokine profiles between patients enrolled in the CTN – 2000 and CTN – 2006 protocols. IFN $\gamma$  levels were generally higher in the CTN – 2000 protocol (Fig. **a**). This held true even when the IFN $\gamma$  levels were normalized to levels of IL-5 or IL-13, by calculation of ratios for IFN $\gamma$ /IL-5 (Fig. **b**) and IFN $\gamma$ /IL-13 (Fig. **c**).
